# Supplementary material for: Induction of AMPK activation by N,N’-diarylurea FND-4b decreases growth and increases apoptosis in triple negative and estrogen-receptor positive breast cancers
Source: PLoS One. 2019 Mar 15;14(3):e0209392. doi: 10.1371/journal.pone.0209392 (PMC6420029; doi:10.1371/journal.pone.0209392)
Supplement: S1 Fig — (XLSX) [file pone.0209392.s001.xlsx]

## Sheet: SRB Growth Assays
MCF-7 Cells
	Raw Data							Compared to Control
µM FND-4b	0	2.5	5	10	20		µM FND-4b	0	2.5	5	10	20
Rep 1	2.344	1.19	0.532	0.429	0.349		Rep 1	97.4569	49.4768	22.119	17.8366	14.5104
Rep 2	2.391	1.121	0.559	0.476	0.324		Rep 2	99.411	46.608	23.2416	19.7907	13.471
Rep 3	2.397	1.262	0.611	0.382	0.338		Rep 3	99.6605	52.4704	25.4036	15.8825	14.0531
Rep 4	2.483	1.176	0.627	0.321	0.267		Rep 4	103.236	48.8947	26.0689	13.3463	11.1011
Rep 5	2.453	1.136	0.513	0.215	0.127		Rep 5	101.989	47.2317	21.3291	8.93909	5.2803
Rep 6	2.363	1.159	0.509	0.222	0.205		Rep 6	98.2468	48.1879	21.1628	9.23013	8.52332
Average =>	2.40517	1.174	0.5585	0.340833	0.268333		Average =>	100	48.8116	23.2208	14.1709	11.1565
Std. Dev. =>	0.0531655	0.049964	0.0503418	0.107784	0.0876896		Std. Dev. =>	2.21047	2.07736	2.09307	4.48135	3.64588
T-47D Cells
	Raw Data							Compared to Control
µM FND-4b	0	2.5	5	10	20		µM FND-4b	0	2.5	5	10	20
Rep 1	1.336	0.769	0.574	0.475	0.114		Rep 1	102.154	58.7995	43.8894	36.3196	8.71671
Rep 2	1.275	0.808	0.507	0.417	0.276		Rep 2	97.4895	61.7816	38.7664	31.8848	21.1036
Rep 3	1.278	0.788	0.568	0.489	0.206		Rep 3	97.7189	60.2523	43.4306	37.3901	15.7512
Rep 4	1.325	0.754	0.533	0.442	0.122		Rep 4	101.313	57.6526	40.7544	33.7964	9.32841
Rep 5	1.26	0.693	0.507	0.352	0.08		Rep 5	96.3426	52.9884	38.7664	26.9147	6.11699
Rep 6	1.373	0.663	0.478	0.339	0.081		Rep 6	104.983	50.6945	36.549	25.9207	6.19345
Average =>	1.30783	0.745833	0.527833	0.419	0.1465		Average =>	100	57.0282	40.3594	32.0377	11.2017
Std. Dev. =>	0.0437969	0.0563894	0.0377434	0.0623827	0.078332		Std. Dev. =>	3.34881	4.31167	2.88595	4.76993	5.98945
MDA-MB-231 Cells
	Raw Data							Compared to Control
µM FND-4b	0	2.5	5	10	20		µM FND-4b	0	2.5	5	10	20
Rep 1	0.7	0.537	0.175	0.077	0.034		Rep 1	106.437	81.6523	26.6092	11.7081	5.16979
Rep 2	0.657	0.474	0.171	0.049	0.017		Rep 2	99.8986	72.073	26.001	7.45058	2.5849
Rep 3	0.65	0.481	0.173	0.047	0.017		Rep 3	98.8343	73.1374	26.3051	7.14648	2.5849
Rep 4	0.659	0.542	0.158	0.056	0.018		Rep 4	100.203	82.4126	24.0243	8.51495	2.73695
Rep 5	0.607	0.492	0.131	0.049	0.008		Rep 5	92.296	74.8099	19.9189	7.45058	1.21642
Rep 6	0.673	0.558	0.157	0.039	0.023		Rep 6	102.331	84.8454	23.8723	5.93006	3.49721
Average =>	0.657667	0.514	0.160833	0.0528333	0.0195		Average =>	100	78.1551	24.4551	8.03345	2.96503
Std. Dev. =>	0.0305134	0.0358385	0.0165217	0.0130295	0.00859651		Std. Dev. =>	4.63964	5.44935	2.51217	1.98116	1.30712
HCC-1806 Cells
	Raw Data							Compared to Control
µM FND-4b	0	2.5	5	10	20		µM FND-4b	0	2.5	5	10	20
Rep 1	0.787	0.544	0.255	0.158	0.068		Rep 1	103.712	71.689	33.6042	20.8214	8.96112
Rep 2	0.795	0.499	0.262	0.183	0.067		Rep 2	104.766	65.7588	34.5267	24.116	8.82934
Rep 3	0.748	0.499	0.25	0.171	0.038		Rep 3	98.5724	65.7588	32.9453	22.5346	5.00769
Rep 4	0.746	0.58	0.269	0.176	0.028		Rep 4	98.3088	76.4331	35.4492	23.1935	3.68987
Rep 5	0.749	0.527	0.264	0.158	0.03		Rep 5	98.7042	69.4487	34.7902	20.8214	3.95344
Rep 6	0.728	0.474	0.224	0.155	0.044		Rep 6	95.9367	62.4643	29.519	20.4261	5.79837
Average =>	0.758833	0.5205	0.254	0.166833	0.0458333		Average =>	100	68.5921	33.4724	21.9855	6.03997
Std. Dev. =>	0.0261948	0.0380039	0.0161617	0.011479	0.017736		Std. Dev. =>	3.45198	5.00821	2.12981	1.51271	2.33728
